# Supplementary material
Source: MDPI journal article supplement (https://www.mdpi.com/1996-1073/13/17/4432)
Supplement: s1 [file s1]

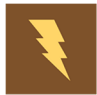**Table S1.** Chemical composition of pretreated solids under DA-SE pretreatment.

| Temperature (°C) | Time | RY (%) | Contents (%) |       |      | Recovered glucan | Removed Xylan | Removed AIL* |
|------------------|------|--------|--------------|-------|------|------------------|---------------|--------------|
|                  |      |        | Glucan       | Xylan | AIL* |                  |               |              |
| 180              | 10   | 62.5   | 42.1         | 2.7   | 44.6 | 74.4             | 82.5          | 6.8          |
| 180              | 15   | 62.0   | 45.9         | 2.4   | 43.3 | 80.6             | 84.4          | 10.3         |
| 195              | 5    | 64.8   | 41.4         | 3.3   | 43.8 | 75.8             | 77.8          | 5.1          |
| 195              | 10   | 63.6   | 42.6         | 1.9   | 43.5 | 76.3             | 87.3          | 7.9          |
| 205              | 5    | 57.7   | 41.6         | 1.5   | 47.6 | 67.9             | 90.7          | 8.5          |
| 215              | 5    | 58.4   | 39.3         | 3.1   | 45.1 | 64.9             | 81.3          | 11.8         |

\*AIL: Acid-insoluble lignin

**Table 2S.** Composition of liquid fraction (prehydrolyzated) obtained after DA-SE pretreatment. Data are expressed as g/100 dry MFGW except for **vainillin, hydroxybenzoic acid and syringaldehyde** which data are expressed as mg/100 g dry MFGW

| Temperature (°C)     |                       | 180         |           | 195         |           | 205         | 215         |
|----------------------|-----------------------|-------------|-----------|-------------|-----------|-------------|-------------|
|                      |                       | 10          | 15        | 5           | 10        | 5           | 5           |
| Main sugars          | Monomeric glucose     | 4.5         | 4.0       | 4.7         | 5.3       | 4.6         | 5.8         |
|                      | Oligomeric Glucose    | 0.3         | 0.0       | 0.1         | 0.0       | 0.0         | 0.0         |
|                      | Monomeric Xylose      | 6.4         | 7.1       | 6.4         | 7.3       | 6.4         | 6.2         |
|                      | Oligomeric Xylose     | 0.1         | 0.0       | 0.5         | 0.0       | 0.5         | 0.0         |
| Degradation products | Furfural              | 0.5         | 0.5       | 0.4         | 0.5       | 0.6         | 0.8         |
|                      | HMF                   | 0.4         | 0.3       | 0.4         | 0.1       | 0.4         | 0.6         |
|                      | Acetic acid           | 2.5         | 2.8       | 2.2         | 2.9       | 2.4         | 2.8         |
|                      | Formic acid           | 0.5         | 0.5       | 0.5         | 0.6       | 0.4         | 0.5         |
|                      | <b>Levulinic acid</b> | <b>0.01</b> | <b>ND</b> | <b>0.01</b> | <b>ND</b> | <b>0.01</b> | <b>0.09</b> |
|                      | Vainillin             | 4           | 7         | 4           | 8         | 7           | 8           |
|                      | Hydroxybenzoic acid   | 34          | 50        | 36          | 52        | ND          | ND          |
| Syringaldehyde       | 6                     | ND          | 7         | 11          | 10        | 12          |             |

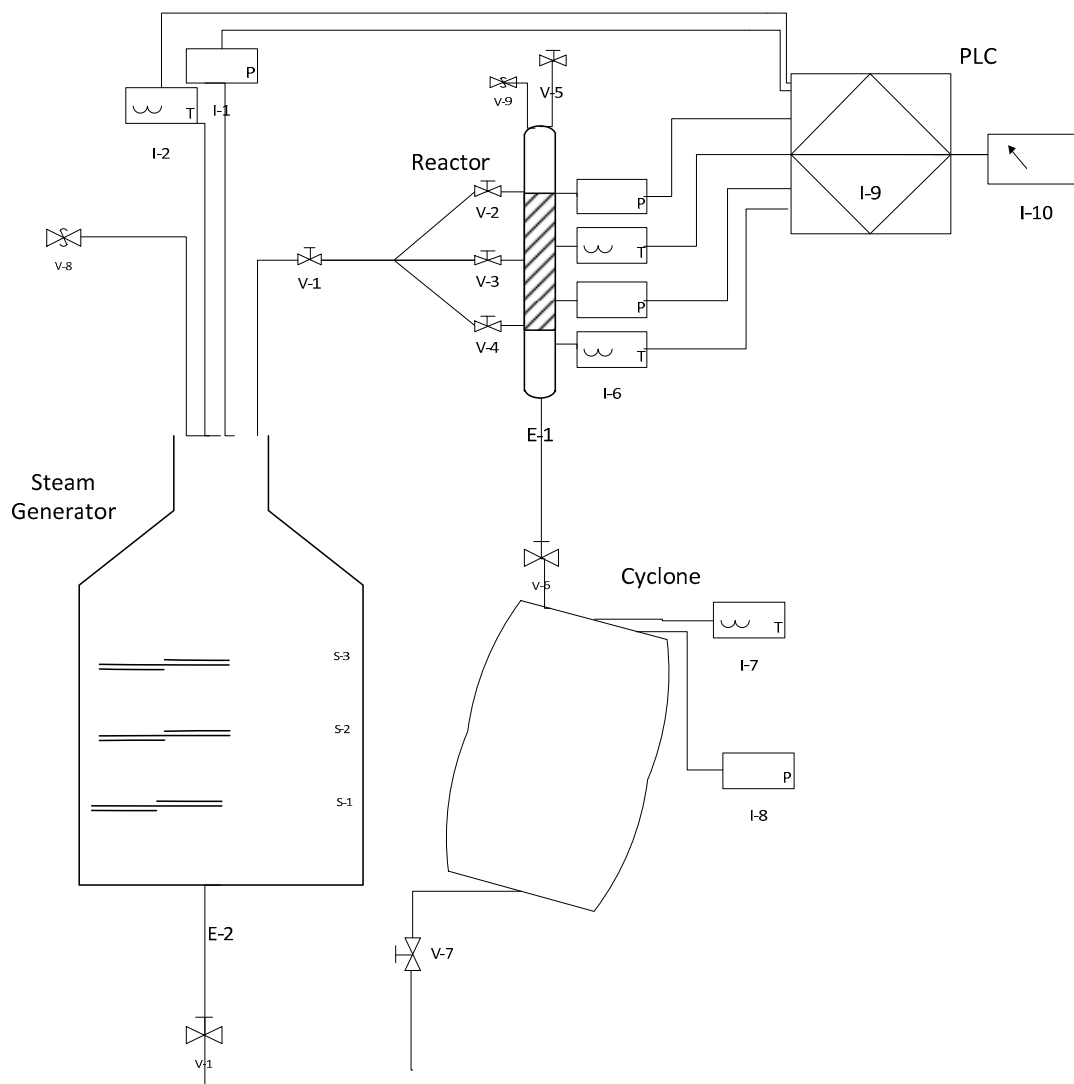

Figure 1S. Schema of steam explosion unit.

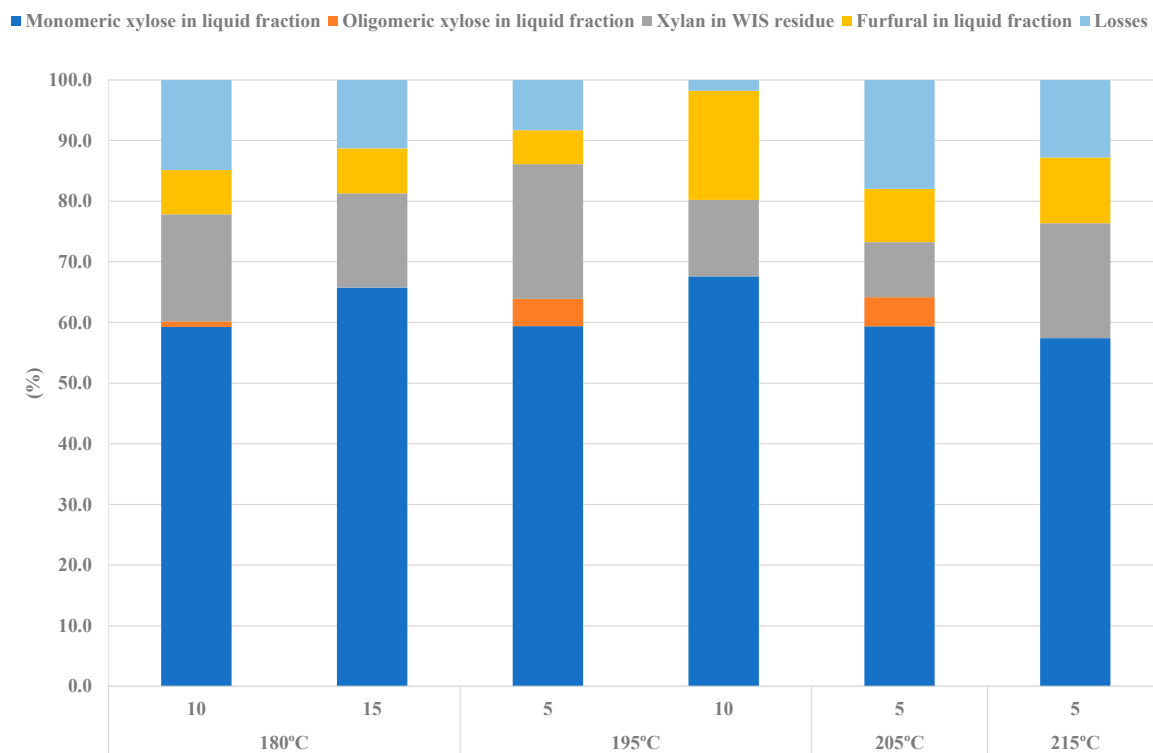

Figure 2S. Xylan distribution in MFGW pretreated with DA-SE pretreatment.
